# Supplementary material for: A Common Cancer Risk-Associated Allele in the hTERT Locus Encodes a Dominant Negative Inhibitor of Telomerase
Source: PubMed Central journal article supplement (PMC4459975; doi:10.1371/journal.pgen.1005286), 2015-06-08
Supplement: pgen.1005286.s005.pdf [file pgen.1005286.s005.pdf]

Supplementary Table 1

| Cell Line      | rs10069690 Haplotype | rs2242652 Haplotype | Origin Tissue |
|----------------|----------------------|---------------------|---------------|
| 184A1          | G:A                  | G:A                 | Breast        |
| 184B5          | G:A                  | G:A                 | Breast        |
| 27/87          | G:A                  | G:G                 | Ovary         |
| 8701BC         | A:A                  | -                   | Breast        |
| A2780          | G:G                  | G:G                 | Ovary         |
| B80-hTERT      | G:A                  | G:A                 | Breast        |
| BT474          | G:A                  | G:A                 | Breast        |
| BT549          | A:A                  | G:A                 | Breast        |
| CAOV3          | A:A                  | A:A                 | Ovary         |
| CaOV4          | G:G                  | G:G                 | Ovary         |
| COLO 316       | G:A                  | G:A                 | Ovary         |
| ES2            | G:A                  | G:G                 | Ovary         |
| HaCaT          | G:G                  | G:G                 | Keratinocyte  |
| HCC1143        | G:G                  | G:G                 | Breast        |
| HCC1937        | A:A                  | G:A                 | Breast        |
| HCC1954        | A:A                  | G:G                 | Breast        |
| HCC70          | A:A                  | G:G                 | Breast        |
| HEK 293T       | A:A                  | A:A                 | Kidney        |
| HeLa           | G:G                  | G:G                 | Cervix        |
| HEY            | A:A                  | G:A                 | Ovary         |
| HOSE 17.1      | G:A                  | G:G                 | Ovary         |
| HOSE 6.3       | G:A                  | G:A                 | Ovary         |
| HS578T         | G:A                  | G:G                 | Breast        |
| IGROV1         | G:G                  | G:G                 | Ovary         |
| Ishikawa       | G:A                  | G:A                 | Uterus        |
| MCF 10A        | G:G                  | G:G                 | Breast        |
| MCF7           | G:G                  | G:G                 | Breast        |
| MDAH-2774      | G:A                  | G:G                 | Ovary         |
| MDA-MB-134     | G:G                  | G:G                 | Breast        |
| MDA-MB-157     | A:A                  | G:G                 | Breast        |
| MDA-MB-175-VII | A:A                  | G:A                 | Breast        |
| MDA-MB-231     | G:G                  | G:G                 | Breast        |
| MDA-MB-330     | G:G                  | G:G                 | Breast        |
| MDA-MB-361     | G:G                  | G:G                 | Breast        |
| MDA-MB-415     | A:A                  | A:A                 | Breast        |
| MDA-MB-436     | G:A                  | G:G                 | Breast        |
| MDA-MB-453     | G:A                  | G:A                 | Breast        |
| MDA-MB-468     | G:A                  | G:G                 | Breast        |
| OAW42          | G:G                  | G:G                 | Ovary         |
| OVCAR3         | G:G                  | G:G                 | Ovary         |
| PEO1           | G:G                  | G:G                 | Ovary         |
| PEO14          | G:G                  | G:G                 | Ovary         |
| PEO4           | G:G                  | G:G                 | Ovary         |
| PMC-42 ET      | G:G                  | G:G                 | Breast        |
| SBOT 3.1       | G:A                  | G:G                 | Ovary         |
| SK-BR-3        | G:A                  | G:G                 | Breast        |
| SKOV3          | G:A                  | G:A                 | Ovary         |
| SUM-159-PT     | G:G                  | G:G                 | Breast        |

|          |     |     |        |
|----------|-----|-----|--------|
| SVCT     | G:A | G:A | Breast |
| T-47D    | G:G | G:G | Breast |
| UACC-812 | G:A | G:G | Breast |
| ZR-75-1  | G:G | G:G | Breast |
